# Supplementary material for: Vertical Pathway Inhibition Overcomes Adaptive Feedback Resistance to KRASG12C Inhibition
Source: Oxford University Press journal article supplement (doi:10.1158/1078-0432.ccr-19-3523), 2019-11-27
Supplement: 10780432ccr193523-sup-231388_1_supp_5908994_q1dnq3.pdf [file 10780432ccr193523-sup-231388_1_supp_5908994_q1dnq3.pdf]

# Supplemental Figure 1

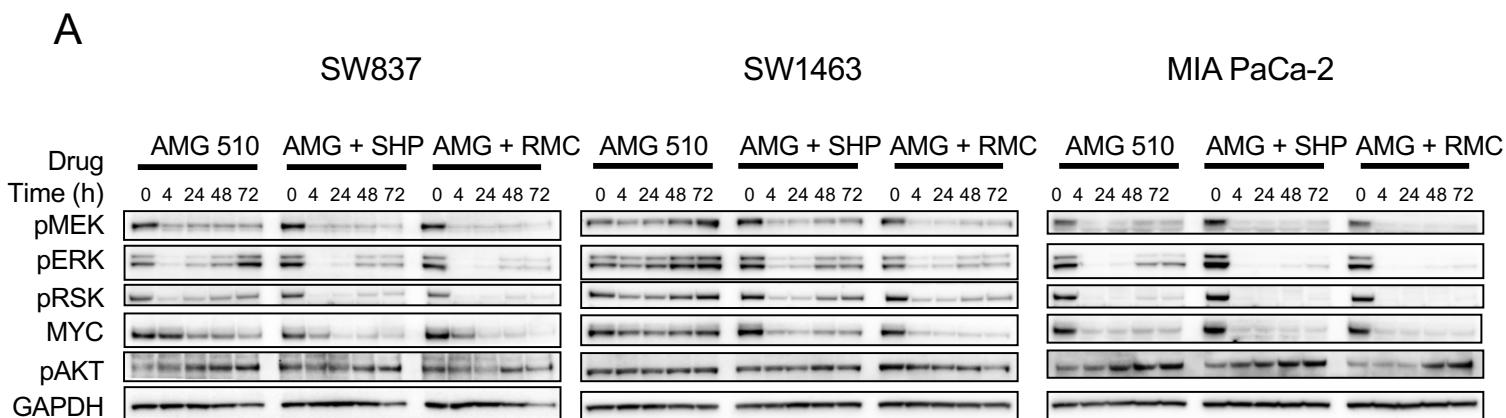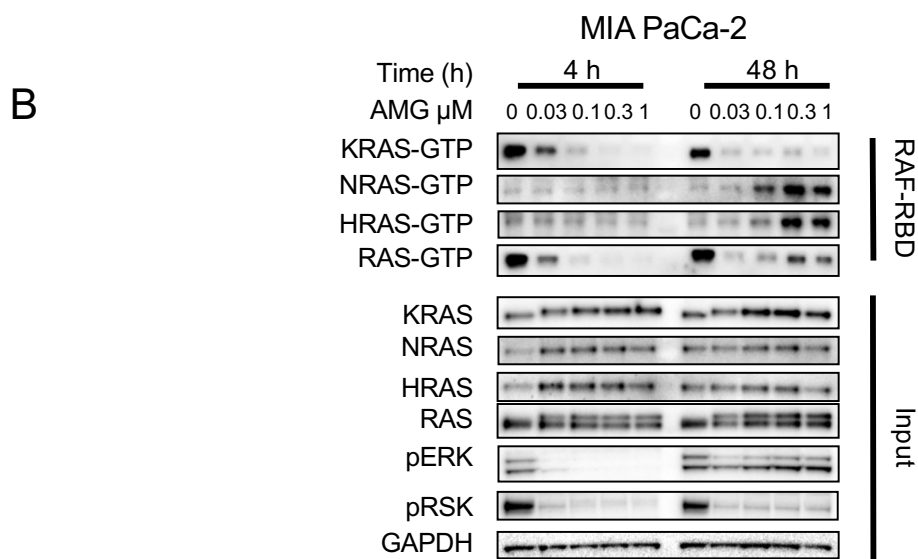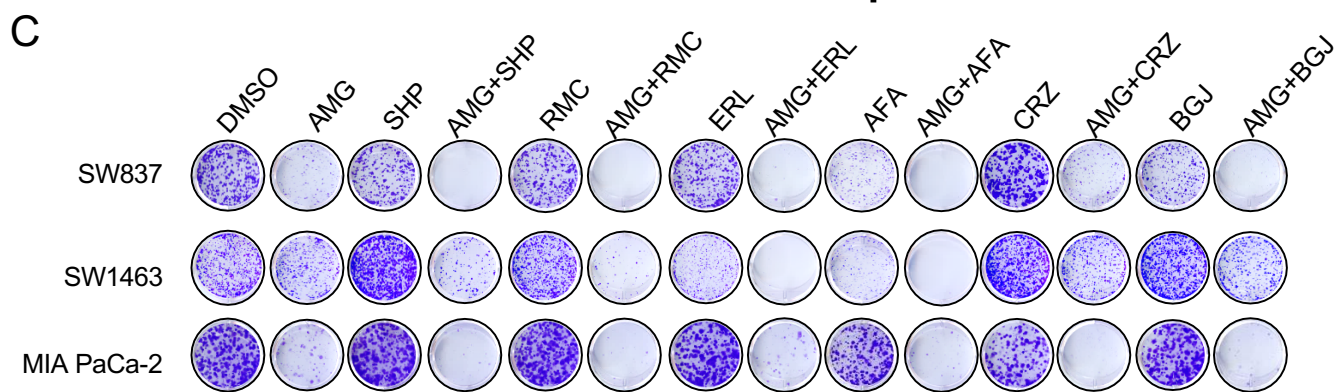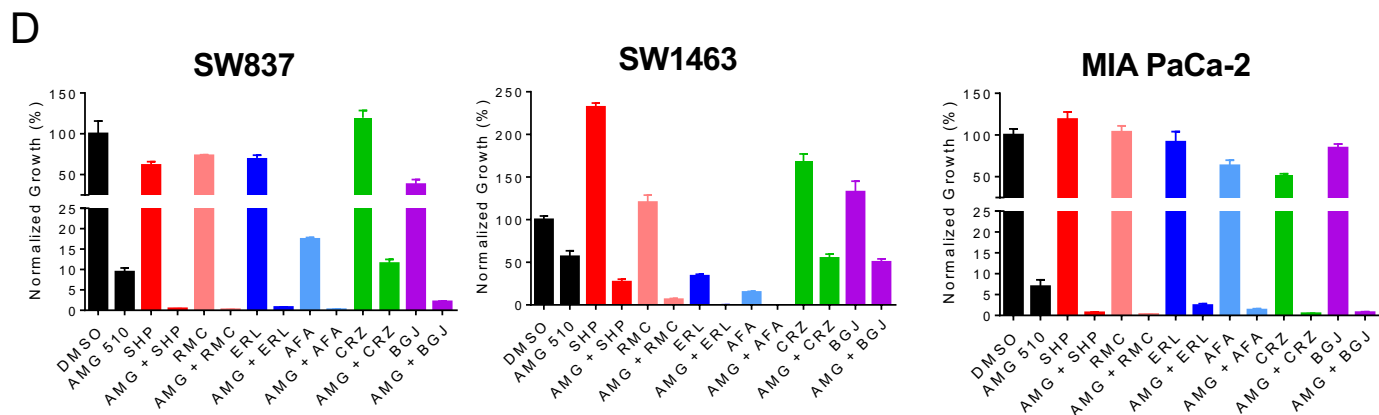

**Supplementary Figure S1. AMG 510 demonstrates cooperativity with SHP2 and RTK inhibition.**(A) SW837, SW1463, and MIA PaCa-2 KRAS<sup>G12C</sup> mutant cell lines were treated with AMG 510 (100 nM) alone or combined with SHP099 (10  $\mu$ M) or RMC-4550 (1  $\mu$ M) for 0, 4, 24, 48, and 72 h. Blot analysis was performed for pMEK, pERK, pRSK, pAKT, and total MYC with GAPDH as a loading control. (B) MIA PaCa-2 treated with a dose titration of 0.03-1  $\mu$ M AMG 510 for 4 or 48 h and lysates were subject to a RAF-RBD pulldown and blot analysis of KRAS, NRAS, HRAS and total RAS as well as pERK, pRSK and GAPDH for input samples. (C) Cell lines were treated for 10-14 days AMG 510 (100 nM), SHP099 (10  $\mu$ M), RMC-4550, erlotinib, afatinib, crizotinib or BGJ398 (all 1  $\mu$ M) and then stained with crystal violet. (D) Individual quantification of cell lines treated in (C).
