# Supplementary material for: Vertical Pathway Inhibition Overcomes Adaptive Feedback Resistance to KRASG12C Inhibition
Source: Oxford University Press journal article supplement (doi:10.1158/1078-0432.ccr-19-3523), 2019-11-27
Supplement: 10780432ccr193523-sup-231388_1_supp_5918024_q1dnrm.pdf [file 10780432ccr193523-sup-231388_1_supp_5918024_q1dnrm.pdf]

**Supplementary Figure S2. KRAS<sup>G12C</sup> inhibitors are subject to adaptive feedback through activation of RTKs.** Cell lines were treated with 1  $\mu$ M ARS-1620 for 48 h and subjected to a phospho-RTK array. Highly expressed RTKs are highlighted for each cell line and additional RTK designations are listed below the arrays.
