# Supplementary material for: Vertical Pathway Inhibition Overcomes Adaptive Feedback Resistance to KRASG12C Inhibition
Source: Oxford University Press journal article supplement (doi:10.1158/1078-0432.ccr-19-3523), 2019-11-27
Supplement: 10780432ccr193523-sup-231388_1_supp_5918029_q1dnsp.pdf [file 10780432ccr193523-sup-231388_1_supp_5918029_q1dnsp.pdf]

# Supplemental Figure 3

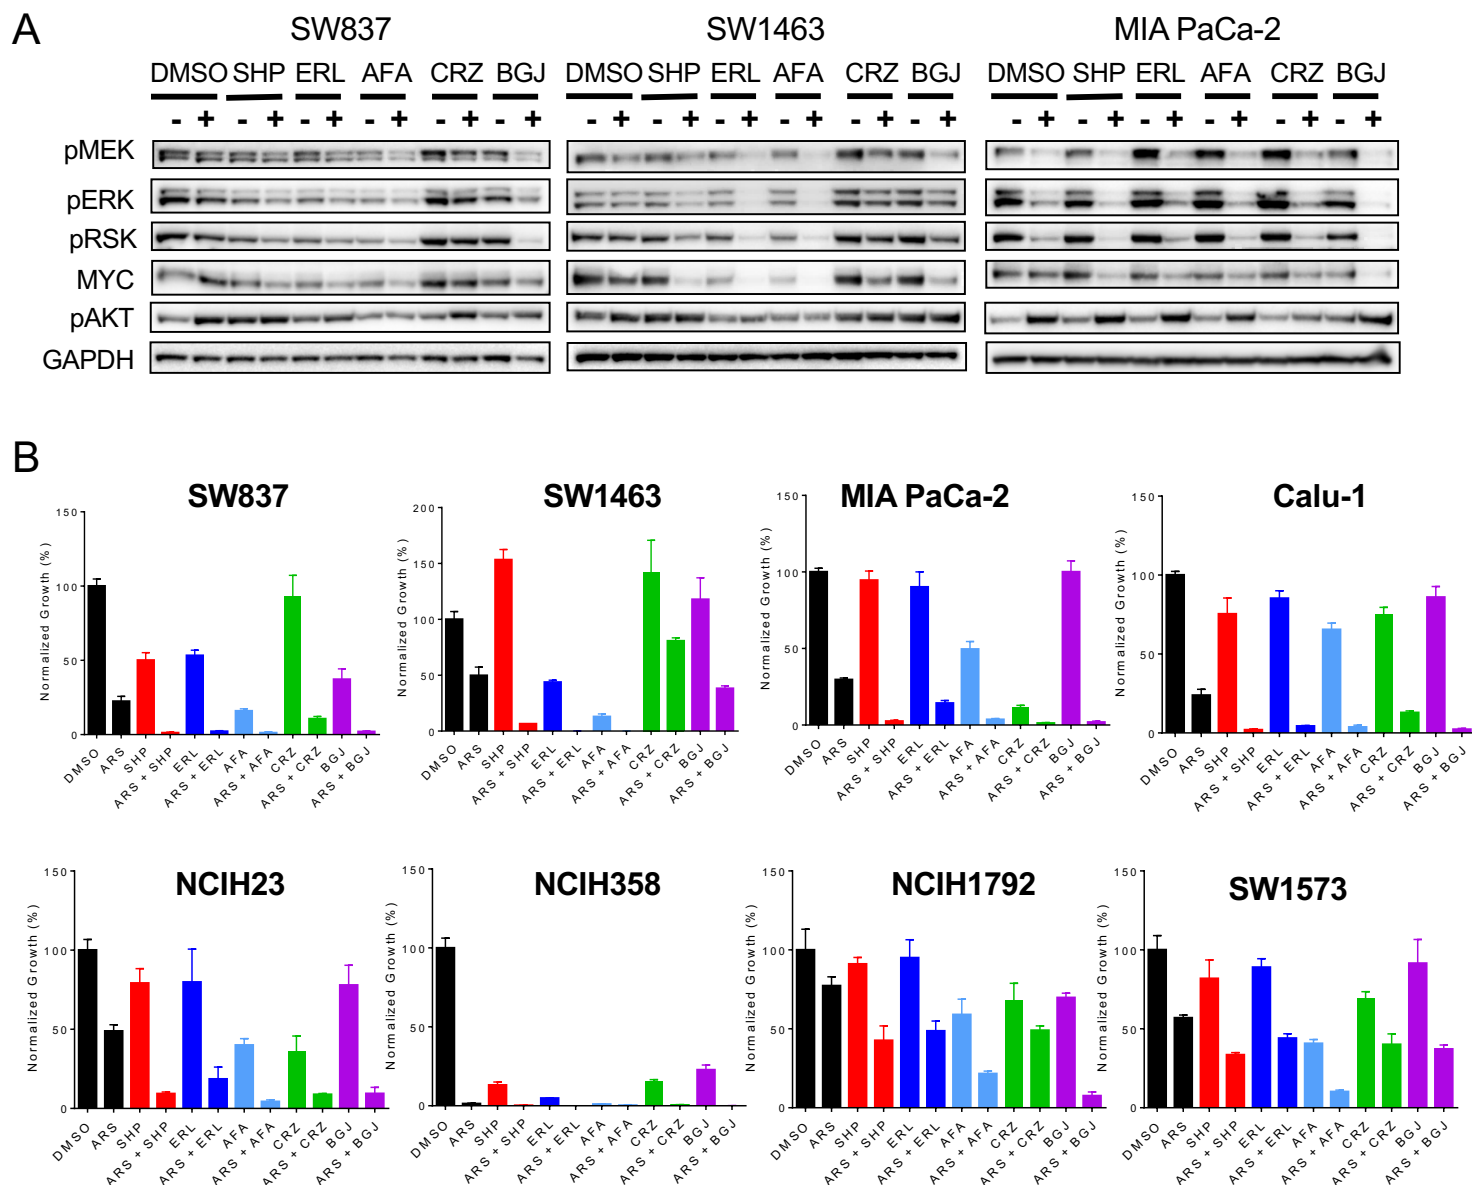

## Supplementary Figure S3. RTK inhibitors display variable cooperative effects with KRAS<sup>G12C</sup>

### inhibitors across models. (A) Cell lines were treated with ARS-1620 (1 $\mu$ M), SHP099 (10 $\mu$ M),

erlotinib, afatinib, crizotinib or BGJ398 (all 1  $\mu$ M) or a combination for 48 h and blot analysis was

performed for pMEK, pERK, pRSK, pAKT as well as total MYC and GAPDH as a loading control. (B)

Individual quantification of cell lines from Figure 3 treated with ARS-1620 (1  $\mu$ M), SHP099 (10  $\mu$ M),

erlotinib, afatinib, crizotinib or BGJ398 (all 1  $\mu$ M) or a combination for 10-14 days and stained with

crystal violet.
