# Supplementary material for: Vertical Pathway Inhibition Overcomes Adaptive Feedback Resistance to KRASG12C Inhibition
Source: Oxford University Press journal article supplement (doi:10.1158/1078-0432.ccr-19-3523), 2019-11-27
Supplement: 10780432ccr193523-sup-231388_1_supp_5918032_q1dntn.pdf [file 10780432ccr193523-sup-231388_1_supp_5918032_q1dntn.pdf]

# Supplemental Figure 4

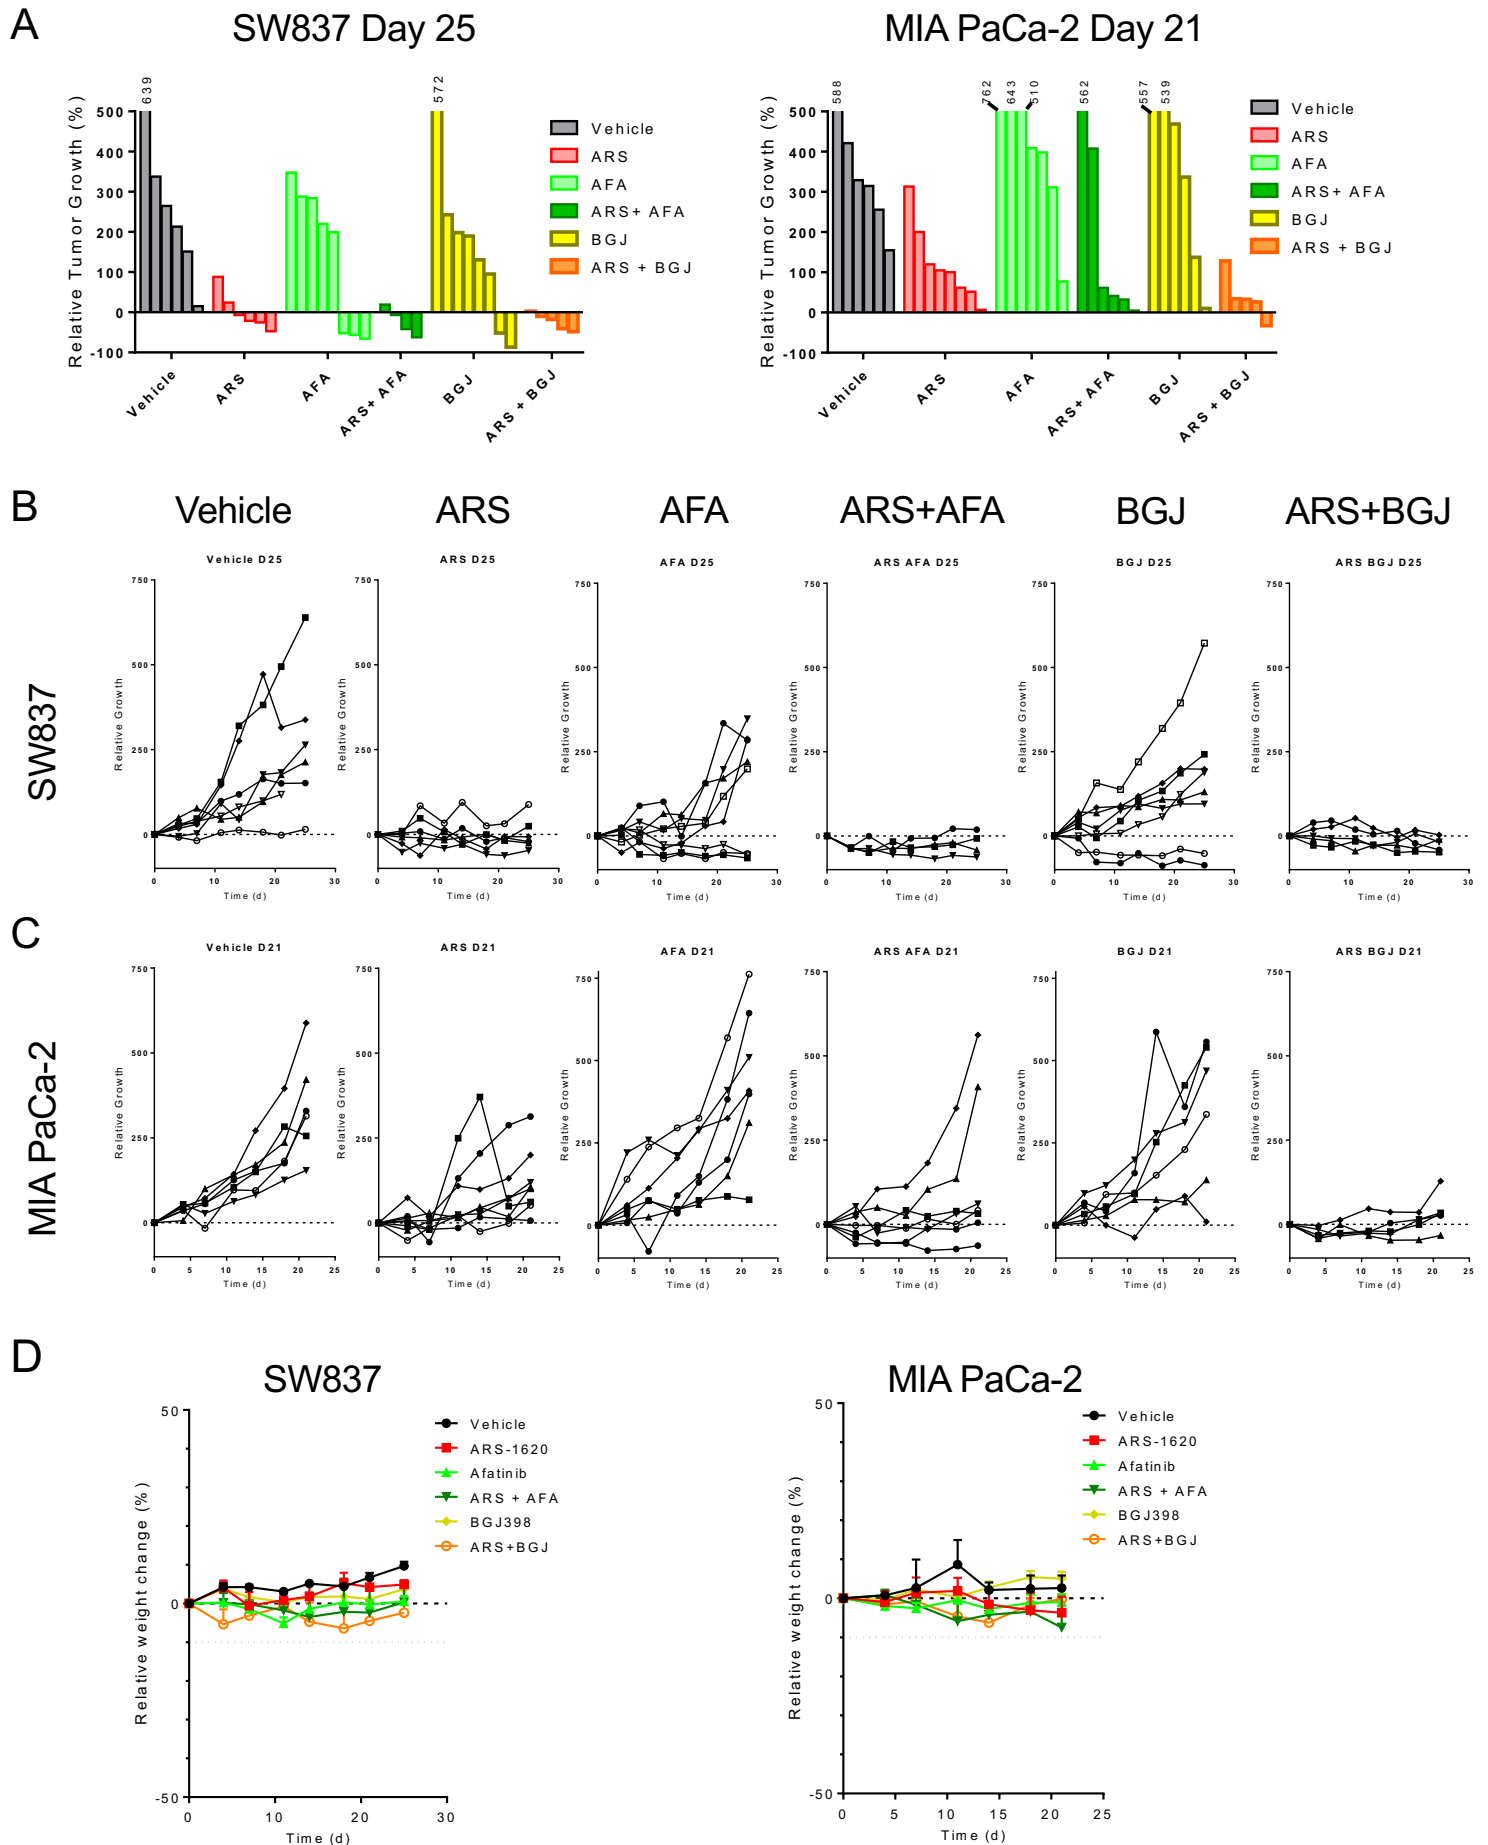

**Supplementary Figure S4. Combined KRAS<sup>G12C</sup> and RTK inhibition improves efficacy *in vivo*.** (A) Waterfall plots of endpoint tumors from SW837 and MIA PaCa-2 xenografts treated daily with ARS-1620 (200 mg/kg), afatinib (12.5 mg/kg), BGJ398 (20 mg/kg) or combination for 25 and 21 days respectively from Figure 2. (B) Individual tumor values for SW837 (B) and MIA PaCa-2 xenografts (C) treated as in (A) from Figure 2. (D) Percent body weight change for xenograft models from Figure 2.
