# Supplementary material for: Vertical Pathway Inhibition Overcomes Adaptive Feedback Resistance to KRASG12C Inhibition
Source: Oxford University Press journal article supplement (doi:10.1158/1078-0432.ccr-19-3523), 2019-11-27
Supplement: 10780432ccr193523-sup-231388_1_supp_5918033_q1dn9s.pdf [file 10780432ccr193523-sup-231388_1_supp_5918033_q1dn9s.pdf]

# Supplemental Figure 5

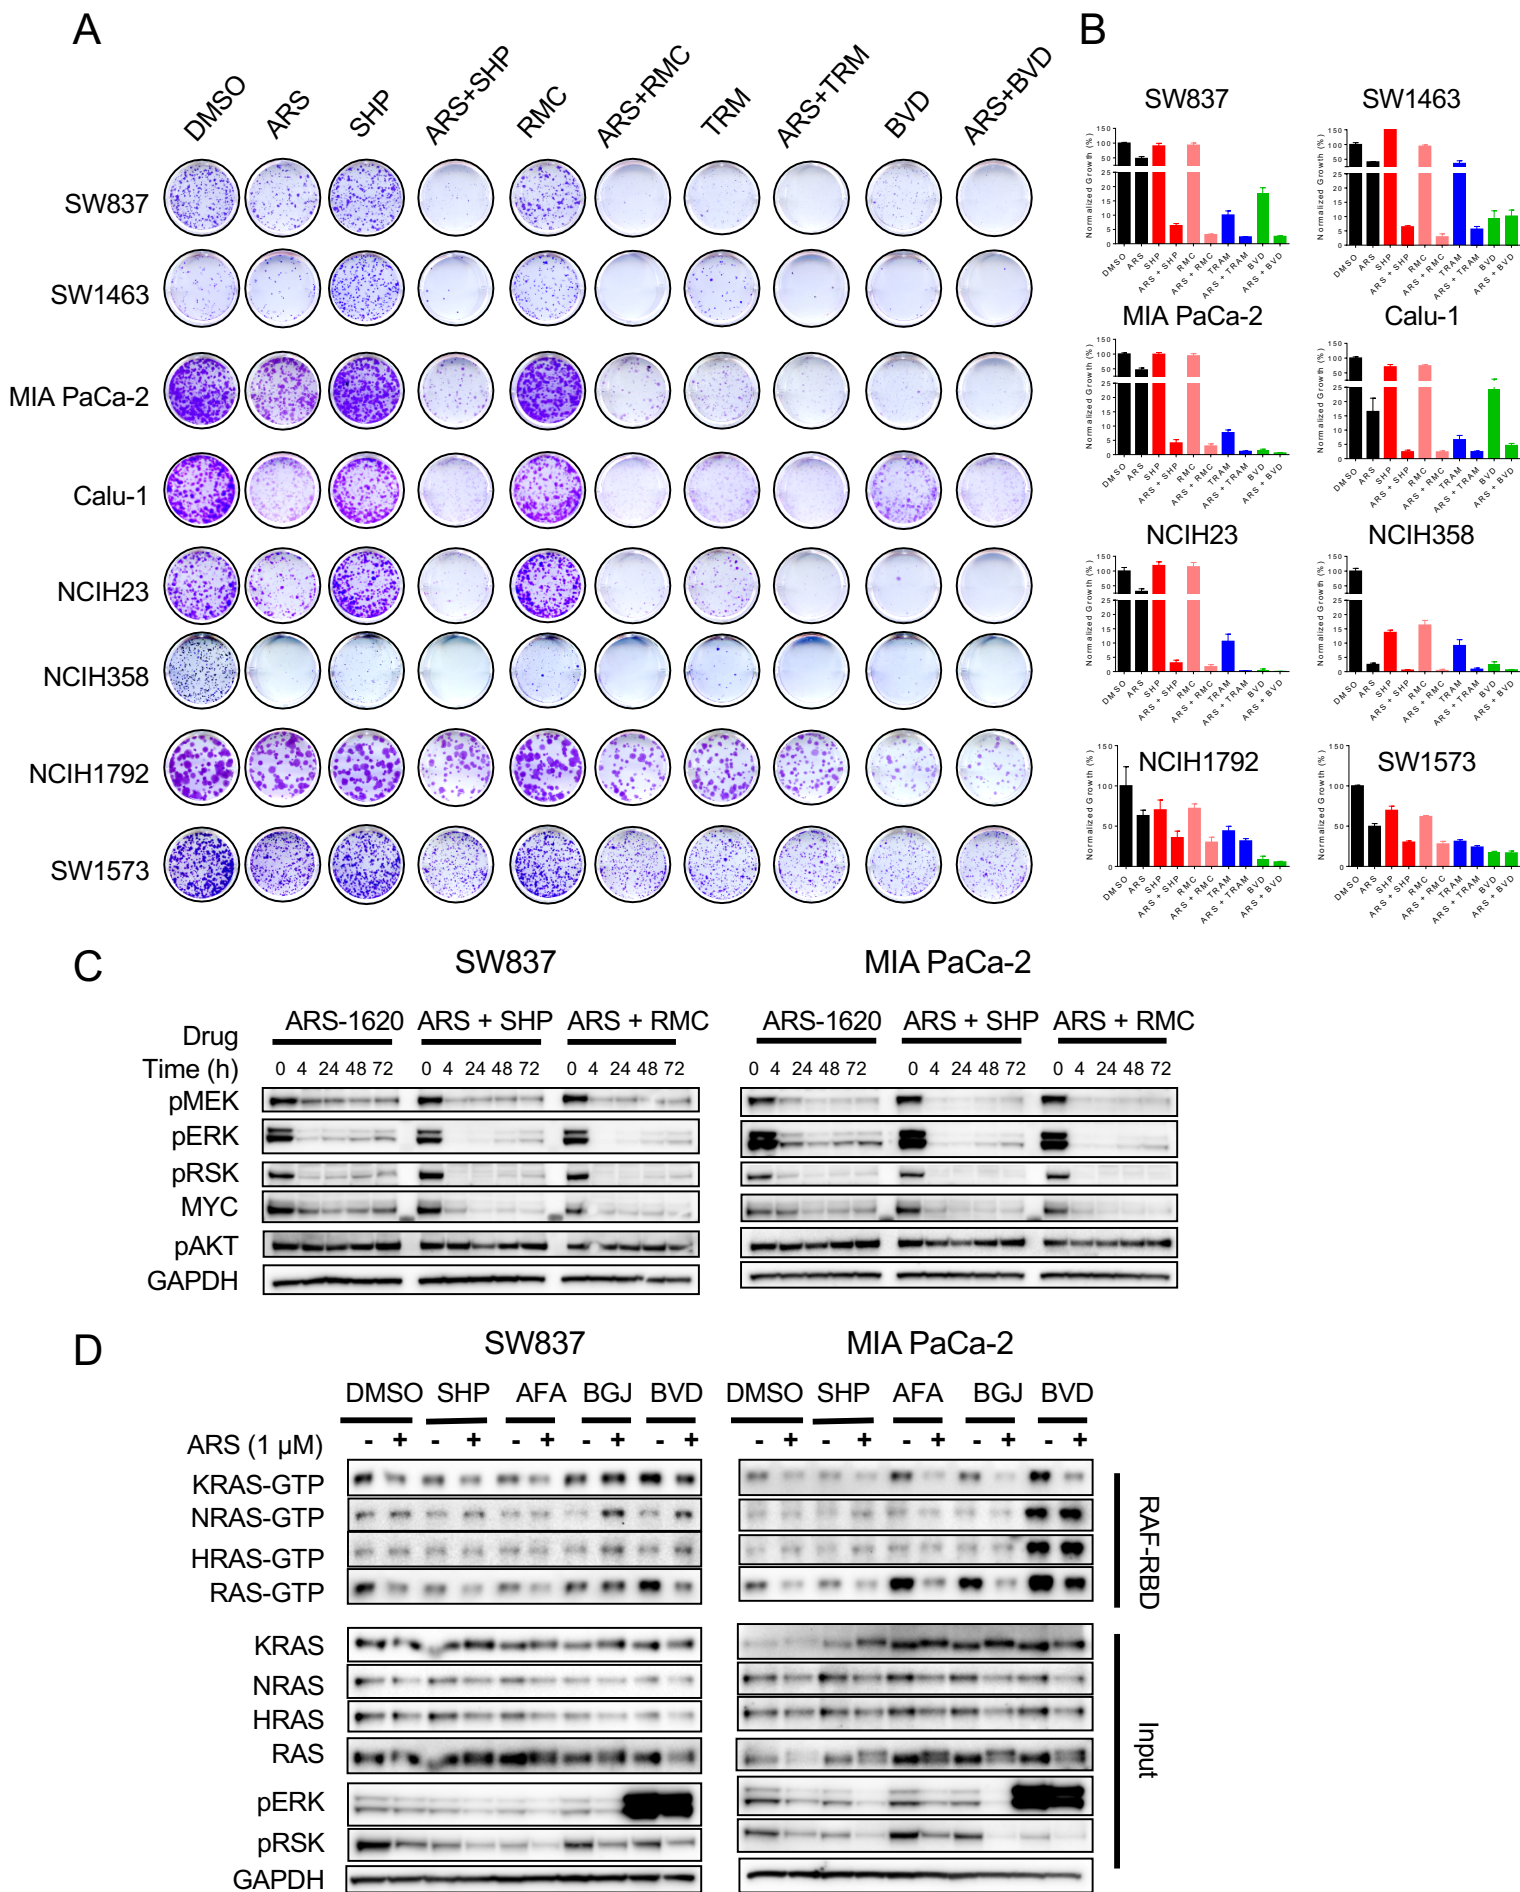

**Supplementary Figure S5. Combined KRAS<sup>G12C</sup> and SHP2 or MAPK inhibition improves *in vitro* efficacy.** (A) Cell lines treated with ARS-1620 (1  $\mu$ M), SHP099 (10  $\mu$ M), RMC-4550 (1  $\mu$ M), trametinib (10 nM), BVD-523 (1  $\mu$ M) or combination for 10-14 days and then stained with crystal violet. (B) Individual quantification of assays in (A) (C) SW837 and MIA PaCa-2 cell lines were treated with ARS-1620 (1  $\mu$ M) alone or combined with SHP099 (10  $\mu$ M) or RMC-4550 (1  $\mu$ M) for 0, 4, 24, 48, and 72 h. Blot analysis was performed for pMEK, pERK, pRSK, pAKT, and total MYC with GAPDH as a loading control. (D) SW837 and MIA PaCa-2 cell lines were treated ARS-1620 (1  $\mu$ M), SHP099 (10  $\mu$ M), afatinib (1  $\mu$ M), BGJ398 (1  $\mu$ M) or BVD-523 (1  $\mu$ M) or a combination and lysates were subject to a RAF-RBD pulldown and blot analysis of KRAS and total RAS as well as pERK, pRSK and GAPDH for input samples
