# Supplementary material for: Vertical Pathway Inhibition Overcomes Adaptive Feedback Resistance to KRASG12C Inhibition
Source: Oxford University Press journal article supplement (doi:10.1158/1078-0432.ccr-19-3523), 2019-11-27
Supplement: 10780432ccr193523-sup-231388_1_supp_5918038_q1dnvz.pdf [file 10780432ccr193523-sup-231388_1_supp_5918038_q1dnvz.pdf]

## Supplemental Figure 6

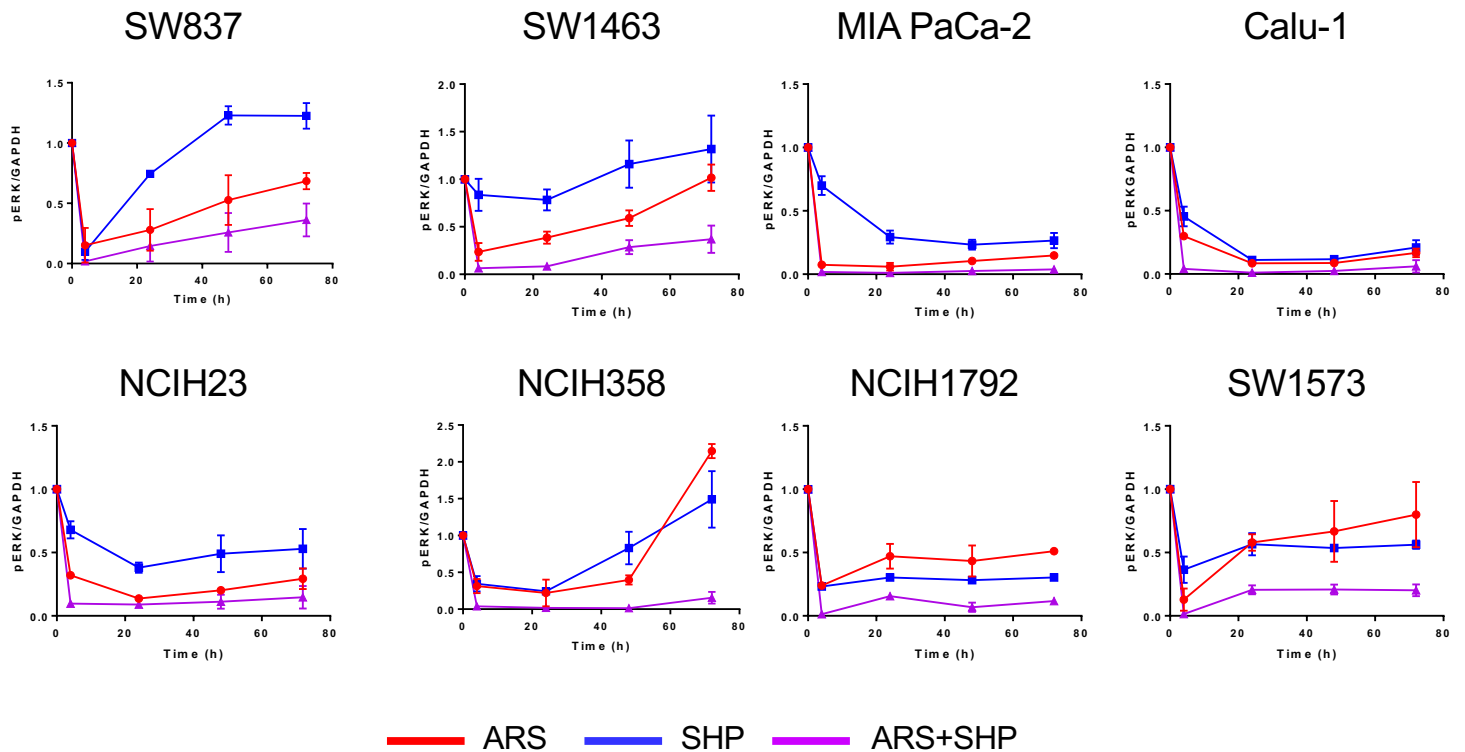

**Supplementary Figure S6. SHP2 inhibition enhances suppression of MAPK signaling in the presence of KRAS<sup>G12C</sup> inhibition.** Individual densitometry quantification of phospho-ERK levels from KRAS<sup>G12C</sup> mutant cell lines treated with ARS-1620 (1  $\mu$ M), SHP099 (10  $\mu$ M) or a combination for 0, 4, 24, 48, and 72 h in Figure 3.
