# Supplementary material for: Vertical Pathway Inhibition Overcomes Adaptive Feedback Resistance to KRASG12C Inhibition
Source: Oxford University Press journal article supplement (doi:10.1158/1078-0432.ccr-19-3523), 2019-11-27
Supplement: 10780432ccr193523-sup-231388_1_supp_5918040_q1dnyb.pdf [file 10780432ccr193523-sup-231388_1_supp_5918040_q1dnyb.pdf]

## Supplemental Figure 8

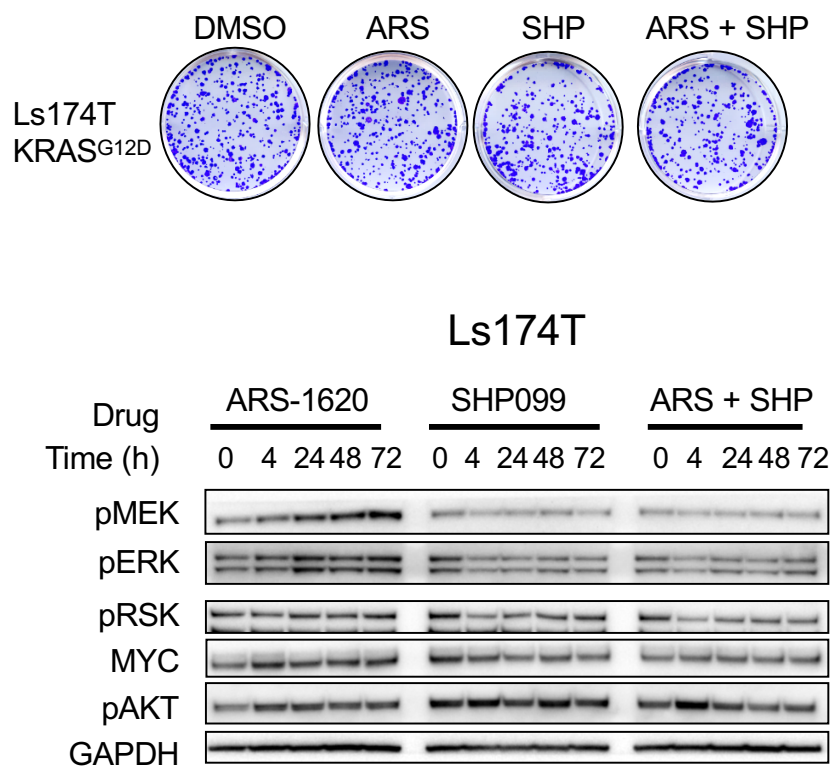

**Supplementary Figure S8. KRAS<sup>G12C</sup> and SHP2 inhibition does not inhibit the growth of signaling of a non-KRAS<sup>G12C</sup> mutant cell line.** (Top) The KRAS<sup>G12D</sup> mutant colon line Ls174T was treated with ARS-1620 (1  $\mu$ M), SHP099 (10  $\mu$ M), or a combination for 10-14 days and then stained with crystal violet. (Bottom) Ls174T cells were treated with ARS-1620 (1  $\mu$ M), SHP099 (10  $\mu$ M) or a combination for 0, 4, 24, 48, and 72 h. Blot analysis was performed for pMEK, pERK, pRSK, pAKT, and total MYC with GAPDH as a loading control.
