# Supplementary material for: Vertical Pathway Inhibition Overcomes Adaptive Feedback Resistance to KRASG12C Inhibition
Source: Oxford University Press journal article supplement (doi:10.1158/1078-0432.ccr-19-3523), 2019-11-27
Supplement: 10780432ccr193523-sup-231388_1_supp_5918041_q1dnz7.pdf [file 10780432ccr193523-sup-231388_1_supp_5918041_q1dnz7.pdf]

# Supplemental Figure 9

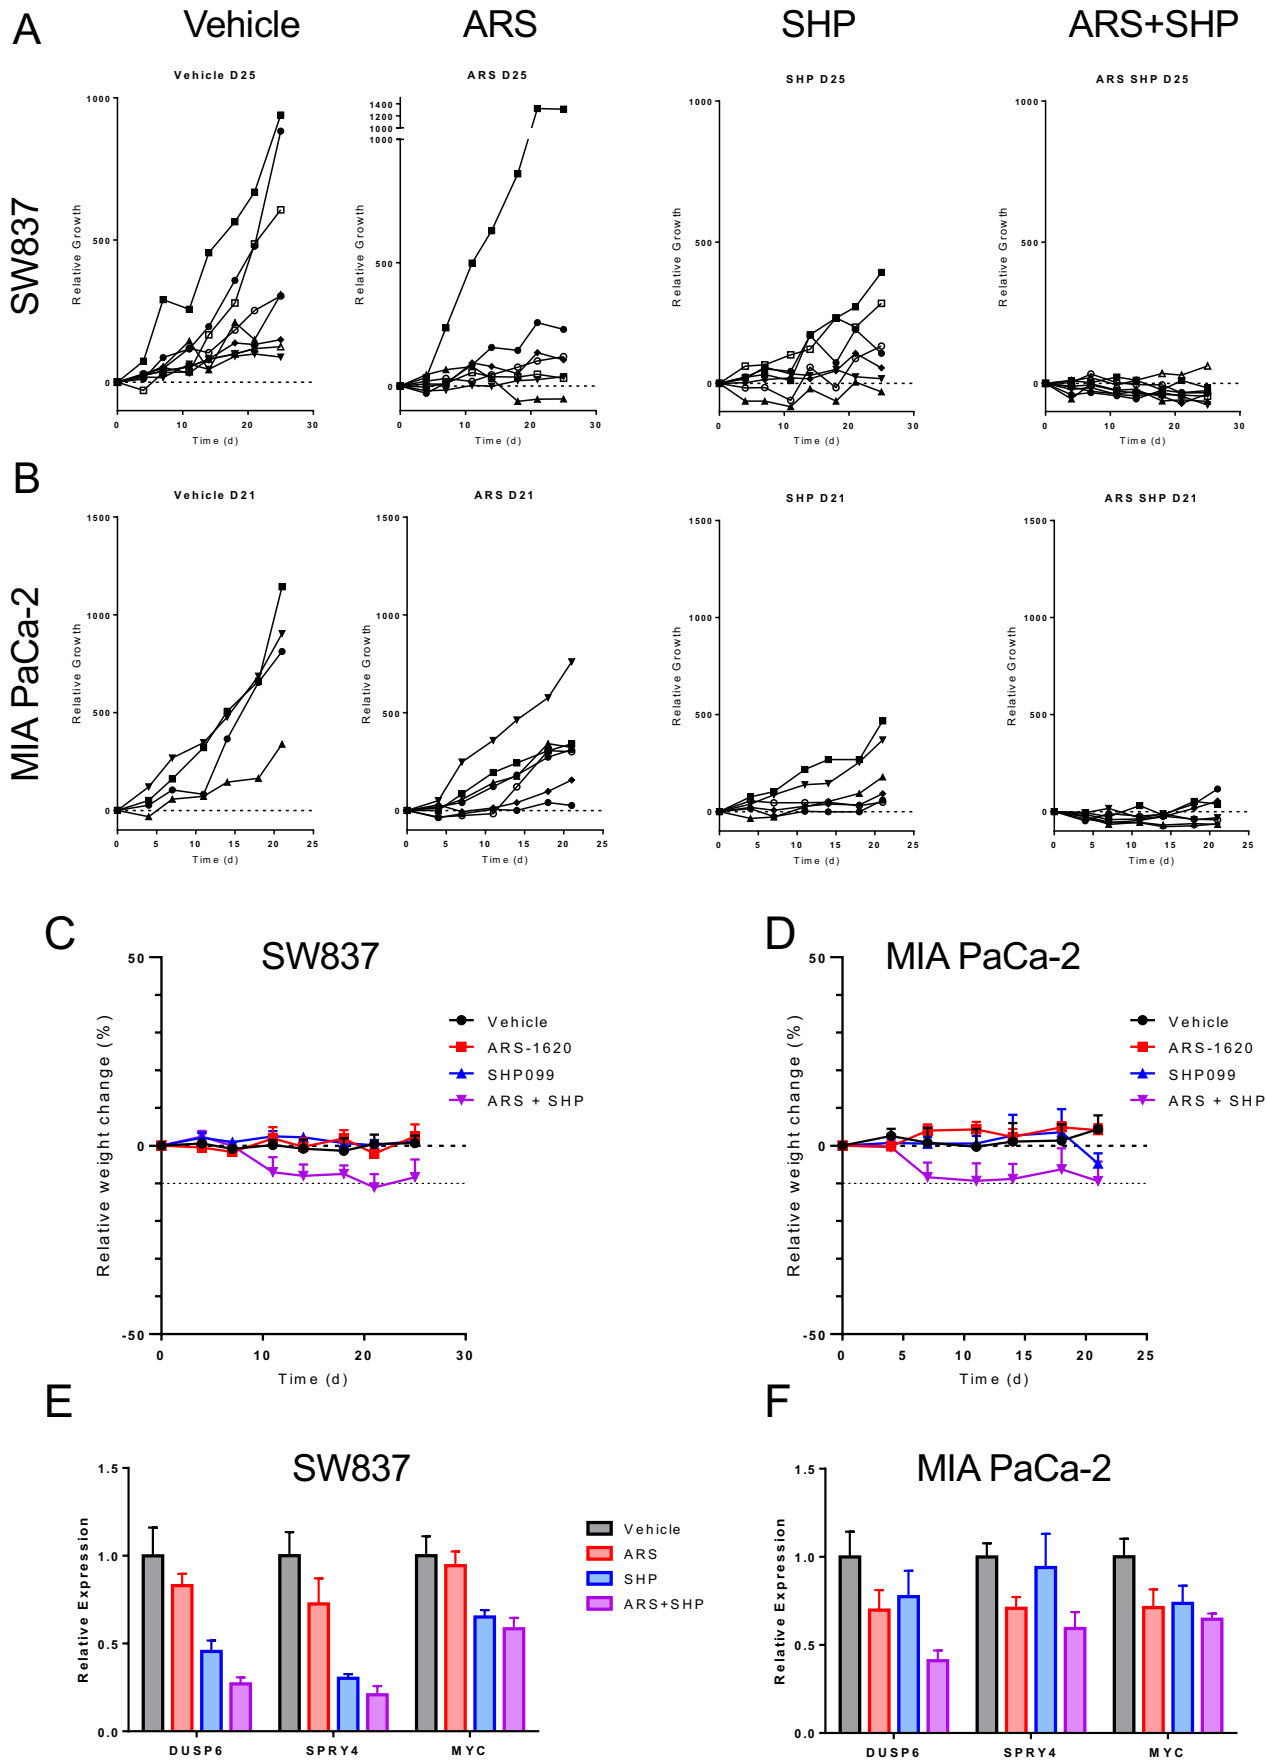

**Supplementary Figure S9. Combined SHP2 and KRAS<sup>G12C</sup> inhibition improves efficacy *in vivo*.** Individual tumor values for SW837 (A) and MIA PaCa-2 xenografts (B) treated daily with ARS-1620 (200 mg/kg), SHP099 (75 mg/kg), or both for 25 and 21 days respectively from Figure 4. (C, D) Percent body weight change for xenograft models from Figure 4. (E,F) SW837 and MIA PaCa-2 tumors treated with ARS-1620 (200 mg/kg), SHP099 (75 mg/kg), or both for 4 days and Taqman quantitative PCR was performed to monitor changes in *DUSP6*, *SPRY4*, and *MYC* gene transcription and *β-actin* was used as an endogenous control.
